# Supplementary material for: Dose-Dependent Effects of Cold Atmospheric Argon Plasma on the Mesenchymal Stem and Osteosarcoma Cells In Vitro
Source: MDPI journal article supplement (doi:10.3390/ijms22136797), 2021-06-24
Supplement: s1 [file s1]

## Supplementary Materials

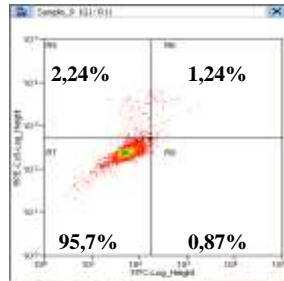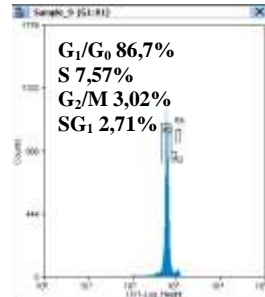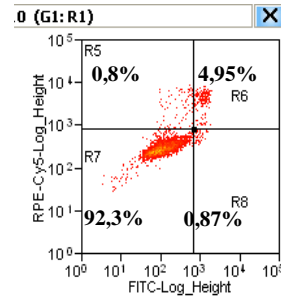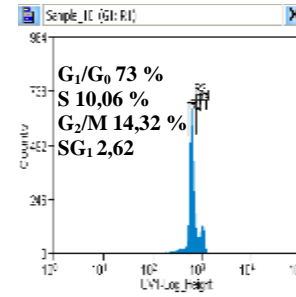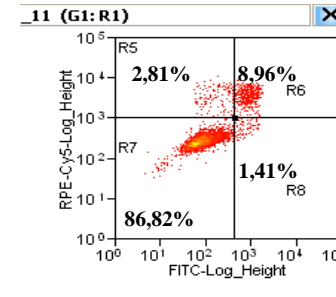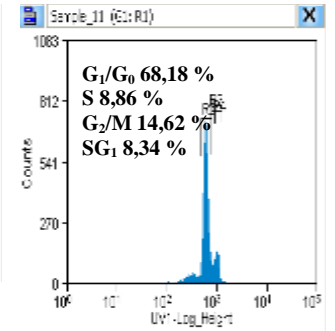

24h

control

10 min

15 min

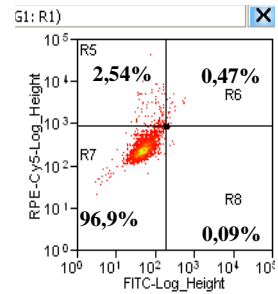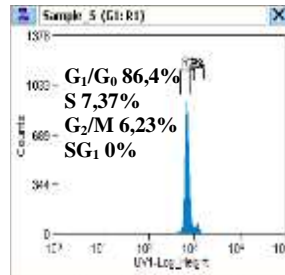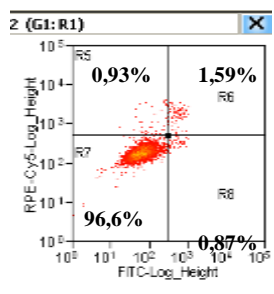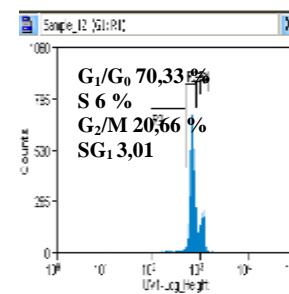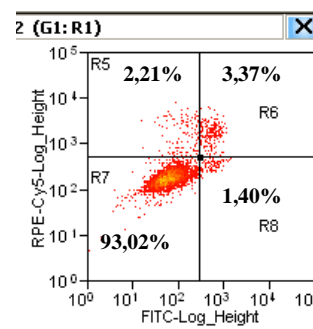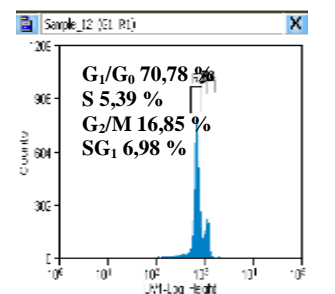

48h

control

10 min

15 min

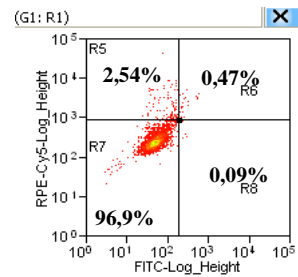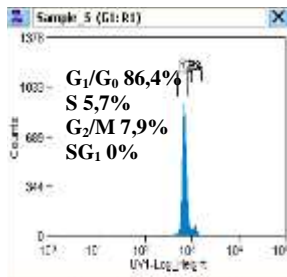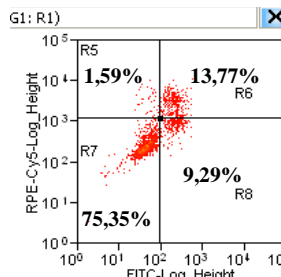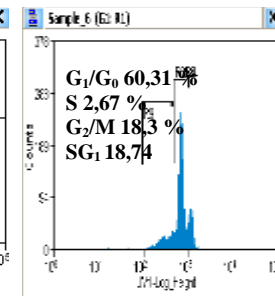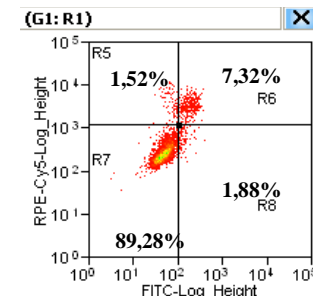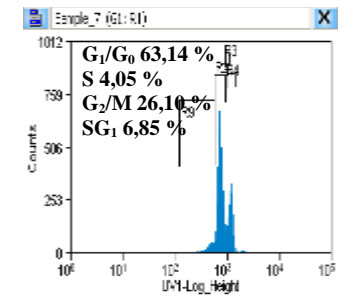

72h

control

10 min

15 min

a

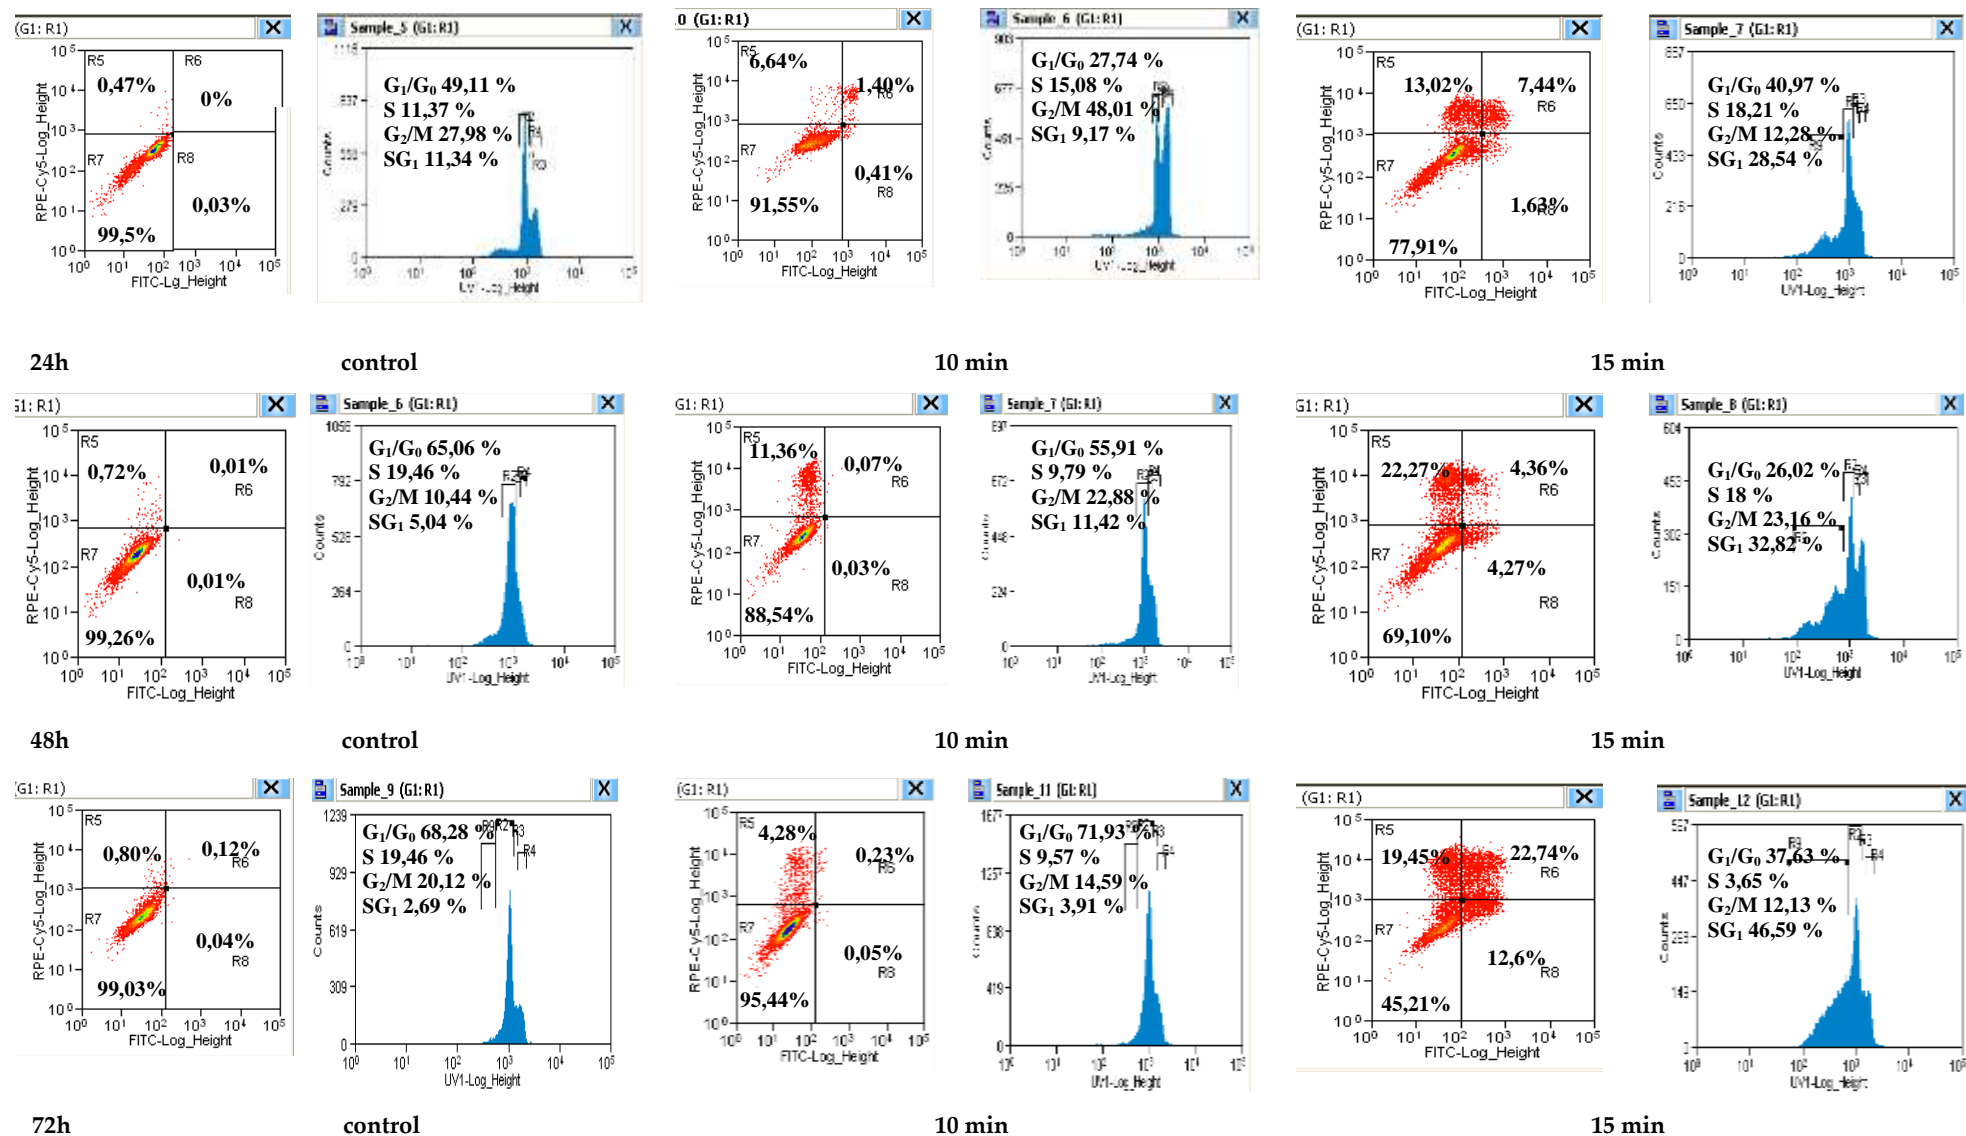

**Figure. S1.** The flow cytometry of cell populations after CAAP irradiation after 24, 48 and 71 h with the 10 and 15 min CAAP exposure time: (a) MSCs (HF); (b) MNNG/HOS. Red dots on the left side of each diagram show the distribution of cells by quadrant depending on their state: R5 – necrosis, R6 – late apoptosis, R7 – living cells, R8 – early apoptosis. The histograms on the right side show cell distribution by cell cycle phases: G<sub>1</sub>/G<sub>0</sub>, S, G<sub>2</sub>/M, and SG<sub>1</sub> (G<sub>1</sub> subphase). The digital data on the histograms are the average values for 3 independent experiments. On the left, the histograms of cell distribution by cell cycle phases are shown in blue; G<sub>1</sub>/G<sub>0</sub>, S, G<sub>2</sub>/M, and SG 1 (G<sub>1</sub> subphase). The digital data on the histograms are the average values of 3 independent experiments.

**Table S1.** Selected gene groups for RT-PCR analysis.

| Gene function                                              | Abbrevia<br>tion | Gene name                                                   | NCBI Reference<br>Sequence | Primer F                      | Primer R                      |
|------------------------------------------------------------|------------------|-------------------------------------------------------------|----------------------------|-------------------------------|-------------------------------|
| Chromosome and<br>Chromatin<br>Modulators                  | KAT2A            | K(lysine) acetyltransferase 2A                              | NM_021078.2                | CATCCGCTTCCCCATTGAC           | AGGTCGGCCACAAAGAGCTT          |
| Chromosome and<br>Chromatin<br>Modulators                  | RB1              | retinoblastoma 1                                            | NM_000321.2                | CACCTCCCATGTTGCTCAAAG         | ATCCGTGCACTCCTGTTCTGA         |
| Chromosome and<br>Chromatin<br>Modulators                  | TERT             | telomerase reverse transcriptase                            | NM_198253.2                | CTCACCCACGCGAAAACCT           | CCACTGTCTTCCGCAAGTTCA         |
| Genes Regulating<br>Symmetric/Asymmet<br>ric Cell Division | DHH              | desert hedgehog                                             | NM_021044.2                | TTGGCCATTGCCGTGAT             | CGTCCCAGCCCTCAGTCA            |
| Genes Regulating<br>Symmetric/Asymmet<br>ric Cell Division | NUMB             | numb homolog (Drosophila)                                   | NM_003744.5                | CCAGGCCGGTCATAGACGTA          | GCCCGGACGCTCTTAGACA           |
| Genes Regulating<br>Symmetric/Asymmet<br>ric Cell Division | PARD6A           | par-6 family cell polarity regulator<br>alpha               | NM_016948.2                | CCGGCCACCCTTGCTAA             | CCACGTCTATGACTGAGGAAAC<br>CT  |
| Notch Pathway                                              | HDAC2            | histone deacetylase 2                                       | NM_001527.3                | GGAGAAGATTGTCCAGTGTTTGA<br>TG | GTTTAACTTCACAGCTCCAGCA<br>ACT |
| Notch Pathway                                              | JAG1             | jagged 1                                                    | NM_000214.2                | TTCCCTTGCTGAGCTCTGTCTT        | TCCGCAGGCACCAGTAGAAG          |
| Notch Pathway                                              | NOTCH1           | notch 1                                                     | NM_017617.3                | GCGGGTCCACCAGTTTGA            | CCGCAGAGGGTGTATTGGTT          |
| Notch Pathway                                              | NOTCH2           | notch 2                                                     | NM_024408.3                | CCACCTGAAGGGAAGCACATAA        | GATGAGCTGGAAAGTCACAAT<br>GG   |
| Osteoblast                                                 | ALPL             | alkaline phosphatase,<br>liver/bone/kidney                  | NM_000478.4                | CATGCTGAGTGACACAGACAAG<br>AA  | ACCGCCCACCACCTTGTAG           |
| Osteoblast                                                 | BGLAP            | osteocalcin (bone gamma-<br>carboxyglutamate (gla) protein) | NM_199173.4                | GGTGCAGAGTCCAGCAAAGG          | GCGCCTGGGTCTCTTCACTA          |
| Osteoblast                                                 | BMP1             | bone morphogenetic protein 1                                | NM_006129.4                | AGGGCAATGATGTGTGCAAGT         | GCCATGCAGCTTGGAGTCA           |
| Osteoblast                                                 | BMPR1A           | bone morphogenetic protein<br>receptor, type IA             | NM_004329.2                | TCAGCGAACTATTGCCAAACAG        | TTGCCCATCCATACTTCTCCAT        |
| Osteoblast                                                 | COL1A1           | collagen, type I, alpha 1                                   | NM_000088.3                | CGATGGCTGCACGAGTCA            | CAGGCGGGAGGTCTTGGT            |
| Osteoblast                                                 | COL3A1           | collagen, type III, alpha 1                                 | NM_000090.3                | TGGAGGATGGTTGCACGAA           | GTAGTCTCACAGCCTTGCGTGT<br>T   |
| Osteoblast                                                 | EGFR             | epidermal growth factor receptor                            | NM_005228.3                | CTGAGCTCTCTGAGTGCAACCA        | CAGCTTTGCAGCCCATTCT           |

|                      |       |                                                                    |             |                             |                               |
|----------------------|-------|--------------------------------------------------------------------|-------------|-----------------------------|-------------------------------|
| Osteoblast           | FGF-2 | fibroblast growth factor 2 (basic)                                 | NM_002006.4 | CGGTCAAGGAAATACACCAGTTG     | GCCCAGGTCCTGTTTTGGAT          |
| Osteoblast           | FGFR1 | fibroblast growth factor receptor 1                                | NM_015850.3 | TGCACCAACGAGCTGTACATG       | CTGCTTGAAGGTGGGTCTCTGT        |
| Osteoblast           | IGF1  | insulin-like growth factor 1<br>(somatomedin C)                    | NM_000618.3 | TGCTTCCGGAGCTGTGATCT        | GCTGACTTGGCAGGCTTGAG          |
| Osteoblast           | IGFR1 | insulin-like growth factor 1 receptor                              | NM_000875.3 | ACGGCATGGCATACTCAAC         | TTCGGCTACCATGCAATTCC          |
| Osteoblast           | RUNX2 | runt-related transcription factor 2                                | NM_004348.3 | GTATGTCCGCCACCACTCACTAC     | GAAGGGTCCACTCTGGCTTTG         |
| Osteoblast           | SMAD2 | SMAD family member 2                                               | NM_005901.5 | GACACCAGTTTTGCCTCCAGTATT    | TCCAGAGGCGGAAGTTCTGTT         |
| Osteoblast           | SMAD4 | SMAD family member 4                                               | NM_005359.5 | CATTGGATGGGAGGCTTCAG        | TCCAGAGACGGGCATAGATCA         |
| Osteoblast           | SMAD5 | SMAD family member 5                                               | NM_005903.6 | AGGAACCTGAGCCACAATGAAC      | GTTGTTGGGCTGGTGAAAG           |
| Osteoblast           | SPP1  | osteopontin-1 (secreted<br>phosphoprotein 1)                       | NM_000582.2 | TTCGCAGACCTGACATCCAGTA      | CCATTCAACTCCTCGCTTTCC         |
| Osteoblast           | TGFB1 | transforming growth factor, beta<br>receptor 1                     | NM_004612.2 | TGTGCTTCGTCTGCATCTCACT      | TGGCACTCGATGGTGAATGA          |
| Osteoblast           | TNF   | tumor necrosis factor                                              | NM_000594.3 | AGGCCAAGCCCTGGTATGA         | GCTGAGTCGGTCACCCTTCTC         |
| Osteoblast           | VDR   | vitamin D (1,25- dihydroxyvitamin<br>D3) receptor                  | NM_000376.2 | GCTGGACGCCACCATAA           | CTCCACCATCATTACACGAAC<br>T    |
| Self-Renewal Markers | HSPA9 | heat shock 70kDa protein 9<br>(mortalin)                           | NM_004134.6 | GCCAGAACCACCCCTTCAG         | GCTTGGCCGGCATTCC              |
| Self-Renewal Markers | SOX1  | Homo sapiens SRY (sex<br>determining region Y)-box 1               | NM_005986.2 | GGTCAAACGGCCCATGAAC         | TGATCTCCGAGTTGTGCATCTT        |
| Wnt Pathway          | APC   | adenomatous polyposis coli                                         | NM_000038.5 | AGCAGCTCAAGCAAACACAGTTC     | TAGGGCTTGGGTTGTAATTAAA<br>AGG |
| Wnt Pathway          | AXIN  | axin 1                                                             | NM_003502.3 | AAGAAATGCCAAGAAGGCTGAG<br>T | TCTGGTTCTTCTCCGCATCCT         |
| Wnt Pathway          | MSX1  | msh homeobox 1                                                     | NM_002448.3 | CAAGTTCCGCCAGAAGCAGTA       | TCTTCACCTGCGTCTCAGTGA         |
| G1 Phase             | CCND1 | cyclin D1                                                          | NM_053056.2 | GCATGTTTCGTGGCCTCTAAGA      | CGGTGTAGATGCACAGCTTCTC        |
| G1 Phase             | CDK4  | cyclin-dependent kinase 4                                          | NM_000075.3 | GCCAGCCGAAACGATCAA          | TGCAATTGGCATGAAGGAAA          |
| S Phase              | CDC6  | cell division cycle 6                                              | NM_001254.3 | CCGTAACCTGTTCTCCTCGTGTA     | TGTCATCGCCAGACGTTT            |
| S Phase              | WEE1  | WEE1 G2 checkpoint kinase                                          | NM_003390.3 | GAGGCTGGATGGATGCATTT        | AAGCGTTCTGCTCATCAACAGA        |
| G2 Phase             | CCNA2 | cyclin A2                                                          | NM_001237.3 | CGGCGCTGCTAGCATTG           | CTGCCTTTTCCGGGTTGATA          |
| M Phase              | AURKB | aurora kinase B                                                    | NM_004217.3 | AGCGAGTCCTCCGAAAGA          | GACATTGGAGCGGCTCATG           |
| M Phase              | CCNB2 | cyclin B2                                                          | NM_004701.3 | CGACCCTTGCCACTACACTTCT      | CTTGGCTAAAGTGTGCTGTTC<br>AC   |
| G1/S Transition      | CUL1  | cullin 1                                                           | NM_003592.2 | ACAACAACGCGGTTACCAAGA       | AGTCACAGTATCGAGCCAGCA<br>A    |
| G1/S Transition      | SKP2  | S-phase kinase-associated protein<br>2,E3 ubiquitin protein ligase | NM_005983.3 | ACAGCACATGGACCTATCGAACT     | TGCAACTTGGAACACTGAGAC<br>AGT  |
| G2/M Transition      | CCNB1 | cyclin B1                                                          | NM_031966.3 | AACATGGCAGGCGCAAAG          | CAATGTCCCAAGAGCTGTTCT         |

|                                                   |             |                                                                                                    |                |                                |                               |
|---------------------------------------------------|-------------|----------------------------------------------------------------------------------------------------|----------------|--------------------------------|-------------------------------|
| G2/M Transition                                   | CDK7        | cyclin-dependent kinase 7                                                                          | NM_001799.3    | CACACAGGCACTGAAAATGAAG<br>TATT | TGGTCTTGGCAGCTGACATC          |
| Cell Cycle<br>Checkpoint and Cell<br>Cycle Arrest | CDKN1B      | cyclin-dependent kinase inhibitor<br>1B (p27, Kip1)                                                | NM_004064.4    | GCCAGCGCAAGTGGAATTT            | CTCCACCTCTTGCCACTCGTA         |
| Cell Cycle<br>Checkpoint and Cell<br>Cycle Arrest | CDKN2A      | cyclin-dependent kinase inhibitor<br>2A                                                            | NM_000077.4    | CCAACGCACCGAATAGTTACG          | GGGCGCTGCCCATCA               |
| Cell Cycle<br>Checkpoint and Cell<br>Cycle Arrest | CDKN2B      | cyclin-dependent kinase inhibitor<br>2B (p15, inhibits CDK4)                                       | NM_004936.3    | GCGACGACAGATGCTAAAATCC         | GAGCAAAGGCCAGCATCCT           |
| Cell Cycle<br>Checkpoint and Cell<br>Cycle Arrest | TP53        | tumor protein p53                                                                                  | NM_000546.5    | CTGTCCCCGGACGATATTGA           | TGGCATTCTGGGAGCTTCAT          |
| DNA Replication                                   | MCM2        | minichromosome maintenance<br>complex component 2                                                  | NM_004526.3    | GCGGGACTATGTGATCGAAGAC         | CGCATGACGCTGAACTTCTG          |
| Asymmetric Division                               | FOXP1       | forkhead box P1                                                                                    | NM_001244808.1 | AACCCACATGCCTCTACCAATG         | GGTGCTCCTCATGGGACAAA          |
| Asymmetric Division                               | SIRT1       | sirtuin 1                                                                                          | NM_012238.4    | CGGGAATCCAAAGGATAATTCAG        | CCTCGTACAGCTTCACAGTCAA<br>CTT |
| Asymmetric Division                               | WNT1        | wingless-type MMTV integration<br>site family, member 1                                            | NM_005430.3    | TGCGCTTCCTCATGAACCTT           | TGGCGCATCTCGGAGAATAC          |
| Cancer Stem Cell<br>Markers                       | ALDH1A<br>1 | aldehyde dehydrogenase 1 family,<br>member A1                                                      | NM_000689.4    | GCAGTGAAGGCCGCAAGA             | CCCTCTCGGAAGCATCCATAG         |
| Cancer Stem Cell<br>Markers                       | CD24        | CD24 molecule                                                                                      | NM_013230.2    | TCCAACTAATGCCACCACCAA          | GACCACGAAGAGACTGGCTGTT        |
| Cancer Stem Cell<br>Markers                       | CD44        | CD44 molecule (Indian blood<br>group)                                                              | NM_000610.3    | CCAAATTCCAGAATGGCTGATC         | TGCAATGCAAACCTGCAAGAAT<br>C   |
| Cancer Stem Cell<br>Markers                       | GATA3       | GATA binding protein 3                                                                             | NM_001002295.1 | GGACGAGAAAGAGTGCCTCAAG<br>T    | GTGGGACGACTCCAGCTTCA          |
| Cancer Stem Cell<br>Markers                       | ITGA6       | integrin, alpha 6                                                                                  | NM_001079818.1 | CCTCCCTGAGCACATATTCGAT         | TGCCACCCATCCTTGTTGA           |
| Cancer Stem Cell<br>Markers                       | ITGB1       | integrin, beta 1 (fibronectin<br>receptor, beta polypeptide, antigen<br>CD29 includes MDF2, MSK12) | NM_002211.3    | CACAGATGCCGGGTTTCACT           | AGGTGACATTGTCCATCATTG<br>G    |
| Loss of Stemness                                  | CD34        | CD34 molecule                                                                                      | NM_001025109.1 | CTTGGGCATCACTGGCTATTTC         | TCTTCGCCCAGCCTTTCTC           |
| Loss of Stemness                                  | FOXA2       | forkhead box A2                                                                                    | NM_021784.4    | CCACCTGAAGCCGGAACA             | TGCTCCGAGGACATGAGGTT          |
| Loss of Stemness                                  | PITCH1      | patched 1                                                                                          | NM_001083603.1 | TGGTTGTGGGCCTCCTCATA           | TCCACGTTGGTCTCGAGGTT          |
| Migration &<br>Metastasis                         | AXL         | AXL receptor tyrosine kinase                                                                       | NM_021913.4    | ACCCAGCCAGACCCTAAGGA           | TGTGGAAGGGCAGAGGACAT          |

|                        |         |                                                                      |                |                              |                              |
|------------------------|---------|----------------------------------------------------------------------|----------------|------------------------------|------------------------------|
| Migration & Metastasis | IL8     | interleukin 8                                                        | NM_000584.3    | AGCTGGCCGTGGCTCTCT           | CTTGGCAAACTGCACCTTCA         |
| Migration & Metastasis | SNAI1   | snail family zinc finger 1                                           | NM_005985.3    | CTTCGCTGACCGCTCCAA           | ACACGCCTGGCACTGGTACT         |
| Migration & Metastasis | TWIST1  | twist family bHLH transcription factor 1                             | NM_000474.3    | GCGCTGCGGAAGATCATC           | TCGCTCTGGAGGACCTGGTA         |
| Migration & Metastasis | ZEB1    | zinc finger E-box binding homeobox 1                                 | NM_001128128.2 | CACTGGTGGTGGCCCATTAC         | TATGGGAGACACCAAACCAAC<br>TG  |
| Pluripotency           | KLF4    | Kruppel-like factor 4 (gut)                                          | NM_004235.4    | TCGCCCCTCAGATGAAC            | CGCATTTTTGGCACTGGAA          |
| Pluripotency           | MYC     | v-myc avian myelocytomatosis viral oncogene homolog                  | NM_002467.4    | AGTCCTGAGACAGATCAGCAAC<br>AA | GTGTGTTGCGCTCTTGACATTCT      |
| Pluripotency           | NANOG   | Nanog homeobox                                                       | NM_024865.2    | ACCAGTCCCAAAGGCAAACA         | CTTGACCGGGACCTTGTCTTC        |
| Pluripotency           | POU5F1  | POU class 5 homeobox 1                                               | NM_002701.5    | ACTGCAGCAGATCAGCCACAT        | CCACACTCGGACCACATCCT         |
| Pluripotency           | SOX2    | SRY (sex determining region Y)-box 2                                 | NM_003106.3    | CTGCGAGCGCTGCACAT            | CCTTCTTCATGAGCGTCTTGGT       |
| Proliferation          | LIN28B  | lin-28 homolog B                                                     | NM_001004317.3 | CCGGCAGAGGAGGAATCC           | TCCCATGCGCACATTGAA           |
| Anti-Apoptotic         | NOS2    | nitric oxide synthase 2, inducible                                   | NM_000625.4    | GGTGGAAGCGGTAACAAAGGA        | TGCTTGGTGGCGAAGATGA          |
| Self-Renewal           | BMP7    | bone morphogenetic protein 7                                         | NM_001719.2    | CAACCTCGTGGAACATGACAAG       | TGAAAGATCAAACCGGAAC<br>C     |
| Self-Renewal           | DNMT1   | DNA (cytosine-5-)-methyltransferase 1                                | NM_001130823.1 | GCCACTGCACGTGTTTGCT          | TCAACCTGGTTATGTTGCTCAC<br>A  |
| Anti-Apoptotic         | BCL2    | B-cell CLL/lymphoma 2                                                | NM_000633.2    | CTGGGATGCCTTTGTGGAAC         | AGACAGCCAGGAGAAATCAAA<br>CAG |
| Anti-Apoptotic         | BIRC3   | aculoviral IAP repeat containing 3                                   | NM_001165.4    | GGACAGGAGTTCATCCGTCAAG       | TCTCCTGGGCTGTCTGATGTG        |
| Anti-Apoptotic         | MCL1    | myeloid cell leukemia 1                                              | NM_021960.4    | CACGAGACGGCCTTCCAA           | CACTCGAGACAACGATTTCACA<br>TC |
| Anti-Apoptotic         | TRAF2   | TNF receptor-associated factor 2                                     | NM_021138.3    | GGCCGTCTGTCCCAGTGAT          | TTCGTGGCAGCTCTCGTATTC        |
| Autophagy              | ATG3    | autophagy related 3                                                  | NM_022488.4    | CCATTGAAAATCACCTCATCTG       | CACCTCAGCATGCCTGCAT          |
| Autophagy              | ATG12   | autophagy related 12                                                 | NM_004707.3    | CCCGGGAACAGAGGAACCT          | GGAGTGTCTCCCACAGCCTTT        |
| Autophagy              | NFKB1   | nuclear factor of kappa light polypeptide gene enhancer in B-cells 1 | NM_003998.3    | GGCTACACCGAAGCAATTGAAG       | CAGCGAGTGGGCCTGAGA           |
| Autophagy              | RPS6KB1 | ribosomal protein S6 kinase, 70kDa, polypeptide 1                    | NM_003161.3    | TGGCATAGAGCAGATGGATGTG       | AGAGTTCGGCTGTCGTATTGGA       |
| Necrosis:              | CCDC103 | coiled-coil domain containing 103                                    | NM_213607.2    | GCTGCAAGGGCTTGTTTCAG         | GCCCCTCCTTCACGGATCT          |
| Necrosis:              | FOXI1   | forkhead box I1                                                      | NM_012188.4    | CGCCTCACTCTCAGCCAGAT         | CCGGCCTTGCTCTTGTTGTA         |
| Necrosis:              | JPH3    | junctophilin 3                                                       | NM_020655.3    | CCAGGATCACTGCCAAAGAGTT       | CGCTTCGGCCTCTGGTACT          |

|               |         |                                                       |                |                               |                             |
|---------------|---------|-------------------------------------------------------|----------------|-------------------------------|-----------------------------|
| Necrosis:     | RAB25   | RAB25, member RAS oncogene family                     | NM_020387.2    | TGTCTTCAAGGTGGTGCTGATC        | CGCGTGAATCGGGAGAGTAG        |
| Pro-Apoptotic | BAX     | BCL2-associated X protein                             | NM_004324.3    | GTGGCAGCTGACATGTTTTCTG        | GCAAAGTAGAAAAGGGCGACA<br>A  |
| Pro-Apoptotic | CD40    | CD40 molecule, TNF receptor superfamily member 5      | NM_001250.4    | ACACTGCCACCAGCACAAATACT       | CTGTTTCTGAGGTGCCCTTCTG      |
| Pro-Apoptotic | CFLAR   | CASP8 and FADD-like apoptosis regulator               | NM_003879.5    | GTGTGTATGGTGTGGATCAGACT<br>CA | GGCATGAATCTCCCATGAACA       |
| Pro-Apoptotic | FAS     | Fas cell surface death receptor                       | NM_000043.4    | GAATCATCAAGGAATGCACACTC<br>A  | AAAGCCACCCCAAGTTAGATCT<br>G |
| Pro-Apoptotic | TNFRSF1 | umor necrosis factor receptor superfamily, member 10a | NM_003844.3    | CTGGCGCTTGGGTCTCCTA           | TGCGTTGCTCAGAATCTCGTT       |
| Housekeeping  | GAPDH   | glyceraldehyde-3-phosphate dehydrogenase              | NM_002046.5    | GTGGAAGGACTCATGACCACAGT       | GCCATCACGCCACAGTTTC         |
| Housekeeping  | RPLP0   | ribosomal protein, large, P0                          | NM_001002.3    | ATGCAGCAGATCCGCATGT           | TTGCGCATCATGGTGTTCTT        |
| Housekeeping  | Actin   | beta-actin                                            | XM_006715764.1 | TCGTGCGTGACATTAAGGAGAA        | AGCAGCCGTGGCCATCT           |
